# Supplementary material for: Unravelling the Role of Institutions in Market-Based Instruments: A Systematic Review on Forest Carbon Mechanisms
Source: MDPI journal article supplement (doi:10.3390/f14010136), 2023-01-11
Supplement: s1 [file s1]

## Supplementary material

Figure S 1. Temporal distribution of establishment of mechanisms

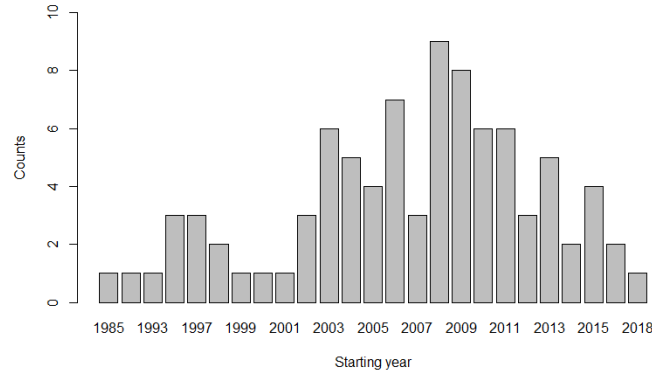

Table S 1. Search string of two-round literature search

| First-round search string                                                                                                               |                                                                                                           |
|-----------------------------------------------------------------------------------------------------------------------------------------|-----------------------------------------------------------------------------------------------------------|
| ("ecosystem service*" OR "environmental service*") AND ("market*" OR "payment*" OR "trading" OR "trade" OR "compensation") AND "carbon" |                                                                                                           |
| Second-round search string*                                                                                                             |                                                                                                           |
| Category 1                                                                                                                              | ("auction" OR "tender") AND "forest" AND "carbon"                                                         |
| Category 2                                                                                                                              | "market*" AND "forest carbon"                                                                             |
| Category 3                                                                                                                              | ("tradable permits" OR "quotas" OR "credits" OR "mitigation banking" OR "concession") AND "forest carbon" |
| Category 4                                                                                                                              | ("fiscal policy" OR "tax" OR "incentive") AND "forest carbon"                                             |
| Category 5                                                                                                                              | "certification" AND "forest carbon"                                                                       |
| Category 6                                                                                                                              | "payment for ecosystem service*" AND "forest carbon"                                                      |
| * The search is based on MBIs classification from (Pettenella et al., 2020)                                                             |                                                                                                           |

Table S 2. Frequency and proportion of actors involved in the reviewed mechanisms (In some cases, there are multiple buyers or intermediaries participating in the mechanisms)

| Actor category/ Actor's role | IG      | G       | D       | CG      | IPLC    | NGO     | SO      | P       |
|------------------------------|---------|---------|---------|---------|---------|---------|---------|---------|
| Buyer/demander               | 15(18%) | 31(35%) | 16(17%) | 9(10%)  | NA      | 7(8%)   | NA      | 51(58%) |
| Seller/provider              | NA      | 10(11%) | NA      | 53(60%) | 32(36%) | 2(2%)   | NA      | 8(9%)   |
| Intermediary/facilitator     | 4(5%)   | 36(41%) | 3(3%)   | 8(9%)   | 1(1%)   | 27(31%) | 11(13%) | 25(28%) |

Table S 3. Description of variables used in the cluster analysis

| Variable      | Levels                                           |
|---------------|--------------------------------------------------|
| Continent     | 1=AF; 2=AS; 3=NA; 4=EU; 5=SA; 6=OC               |
| Spatial scale | 1=local; 2=regional; 3=national; 4=international |

|                                                                                            |                                                                                                                                                                                             |
|--------------------------------------------------------------------------------------------|---------------------------------------------------------------------------------------------------------------------------------------------------------------------------------------------|
| Funding source                                                                             | 1=public; 2=private; 3=mixed                                                                                                                                                                |
| Forest ownership<br>(*Forest ownership of the country where the mechanism was implemented) | 1=All forest land is owned publicly<br>2=Public ownership predominance<br>3=Balanced ownership between public and private<br>4=Private ownership predominance<br>5=Diverse forest ownership |
| REDD+                                                                                      | 0=No; 1=Yes                                                                                                                                                                                 |
| CDM                                                                                        | 0=No; 1=Yes                                                                                                                                                                                 |
| JI                                                                                         | 0=No; 1=Yes                                                                                                                                                                                 |
| Government-led PES                                                                         | 0=No; 1=Yes                                                                                                                                                                                 |
| User-financed PES                                                                          | 0=No; 1=Yes                                                                                                                                                                                 |
| Cap-and-trade                                                                              | 0=No; 1=Yes                                                                                                                                                                                 |
| Competitive tenders/auctions                                                               | 0=No; 1=Yes                                                                                                                                                                                 |
| Definition of standards, certifications, eco-labelling                                     | 0=No; 1=Yes                                                                                                                                                                                 |
| Offset scheme                                                                              | 0=No; 1=Yes                                                                                                                                                                                 |
| Corporate social responsibility                                                            | 0=No; 1=Yes                                                                                                                                                                                 |
| Public-private contract                                                                    | 0=No; 1=Yes                                                                                                                                                                                 |
| Subsidies and grants                                                                       | 0=No; 1=Yes                                                                                                                                                                                 |
| Tax exemption and rebates                                                                  | 0=No; 1=Yes                                                                                                                                                                                 |

*Table S 4. PC extraction (eigenvalues and variance explained of the first 7 PCs) and factor loadings (only loadings of the first 5 PCs are reported)*

|                           | Variable                                      | PC1   | PC2   | PC3   | PC4   | PC5   | PC6   | PC7   |
|---------------------------|-----------------------------------------------|-------|-------|-------|-------|-------|-------|-------|
| <i>PC extraction</i>      |                                               |       |       |       |       |       |       |       |
|                           | Eigenvalues                                   | 0.21  | 0.16  | 0.13  | 0.12  | 0.10  | 0.09  | 0.09  |
|                           | % of variance                                 | 13.10 | 10.03 | 8.06  | 7.55  | 6.59  | 5.86  | 5.67  |
|                           | Cumulative % of variance                      | 13.10 | 23.13 | 31.19 | 38.74 | 45.33 | 51.19 | 56.86 |
| <i>PC factor loadings</i> |                                               |       |       |       |       |       |       |       |
| Continent                 | AF                                            | -0.89 | -0.19 | -0.82 | -0.25 | 0.23  |       |       |
|                           | AS                                            | -0.34 | -0.53 | 0.31  | 0.66  | -1.19 |       |       |
|                           | EU                                            | -0.15 | 1.46  | 0.78  | 0.75  | 0.59  |       |       |
|                           | NA                                            | 0.77  | 0.33  | -0.70 | -0.39 | 0.31  |       |       |
|                           | OC                                            | 1.83  | -1.40 | -0.21 | 1.66  | -0.01 |       |       |
|                           | SA                                            | 0.12  | -0.56 | 1.18  | -1.17 | 0.23  |       |       |
| Funding source            | International                                 | 0.62  | 1.82  | -1.49 | -1.35 | -1.19 |       |       |
|                           | Local                                         | -0.69 | -0.10 | -0.05 | 0.14  | -0.10 |       |       |
|                           | National                                      | 1.31  | -0.20 | -0.17 | 0.29  | 0.18  |       |       |
|                           | Regional                                      | -0.02 | 0.01  | 1.14  | -0.55 | 0.54  |       |       |
|                           | Mixed                                         | -0.67 | 0.20  | 0.01  | 0.07  | 0.73  |       |       |
|                           | Private                                       | -0.27 | 0.66  | -0.16 | -0.18 | -0.54 |       |       |
| Forest ownership          | Public                                        | 0.73  | -0.70 | 0.12  | 0.09  | -0.12 |       |       |
|                           | All forest land is owned publicly             | -0.99 | -0.42 | -0.79 | -0.69 | -0.11 |       |       |
|                           | Balanced ownership between public and private | 0.22  | 0.20  | 1.50  | -0.98 | 0.49  |       |       |
|                           | Diverse forest ownership                      | 0.07  | -0.15 | 0.03  | -0.83 | 0.58  |       |       |
|                           | Private ownership predominance                | 0.09  | 0.71  | -0.52 | 0.28  | 0.26  |       |       |
|                           | Public ownership predominance                 | 0.04  | -0.70 | 0.24  | 0.48  | -0.63 |       |       |
| Policy instruments        | No. REDD                                      | 0.45  | 0.28  | 0.11  | 0.17  | -0.11 |       |       |
|                           | REDD                                          | -0.91 | -0.57 | -0.23 | -0.35 | 0.23  |       |       |
|                           | CDM                                           | -0.65 | -0.67 | -0.55 | 0.72  | -0.92 |       |       |
|                           | No. CDM                                       | 0.06  | 0.07  | 0.06  | -0.07 | 0.09  |       |       |
|                           | JI                                            | -0.06 | -0.83 | 2.25  | -1.83 | 0.80  |       |       |
|                           | No. JI                                        | 0.00  | 0.01  | -0.03 | 0.02  | -0.01 |       |       |
|                           | Government-led PES                            | 1.35  | -0.49 | 0.50  | -0.54 | 0.01  |       |       |
|                           | No. government-led PES                        | -0.32 | 0.12  | -0.12 | 0.13  | 0.00  |       |       |
|                           | No. user-financed PES                         | 0.04  | -0.23 | -0.16 | -0.14 | 0.03  |       |       |
|                           |                                               |       |       |       |       |       |       |       |

|                                     |       |       |       |       |       |
|-------------------------------------|-------|-------|-------|-------|-------|
| User-financed PES                   | -0.26 | 1.35  | 0.91  | 0.81  | -0.16 |
| Cap-and-trade                       | 1.08  | -0.33 | -1.04 | 1.54  | 2.16  |
| No. cap-and-trade                   | -0.07 | 0.02  | 0.06  | -0.09 | -0.13 |
| Auction                             | 1.75  | -0.23 | -1.01 | 1.02  | 1.18  |
| No. auction                         | -0.15 | 0.02  | 0.09  | -0.09 | -0.10 |
| Certification                       | 0.69  | 1.88  | -1.49 | -1.07 | -1.15 |
| No. certification                   | -0.05 | -0.14 | 0.11  | 0.08  | 0.08  |
| No. offset scheme                   | 0.85  | 0.43  | 0.20  | -0.30 | -0.36 |
| Corporate social responsibility     | -0.56 | -0.28 | -0.13 | 0.19  | 0.24  |
| No. corporate social responsibility | -0.6  | 1.62  | 1.39  | 1.47  | 0.07  |
| No. public-private contract         | 0.05  | -0.14 | -0.12 | -0.13 | -0.01 |
| Public-private contract             | 0.04  | 0.00  | -0.02 | 0.00  | -0.01 |
| No. subsidies                       | -0.75 | 0.05  | 0.37  | 0.07  | 0.24  |
| subsidies                           | -0.03 | 0.03  | -0.01 | -0.04 | 0.04  |
| No. tax                             | 1.19  | -1.46 | 0.22  | 1.78  | -1.80 |
| Tax                                 | -0.02 | 0.00  | 0.01  | 0.00  | 0.00  |
